1  
2  
3  
4  
5  
6  
7  
8  
9  
10  
11  
12  
13  
14  
15  
16  
17  
18  
19  
20  
21  
22  
23  
24  
25

## Teenage Blues: predictors of depression among adolescents in Nigeria

Nzeakah C W<sup>1,2¶</sup>, DadeMatthews A O<sup>3&\*</sup>, Onofa U O<sup>2¶</sup>, DadeMatthews O D<sup>4&</sup>, Ogundare T<sup>5&</sup>

<sup>1</sup>Cygnnet Hospital Maidstone, Gidds Pond Way, off Newnham Court Way Maidstone, Kent England

<sup>2</sup>Neuropsychiatric Hospital, Aro, Abeokuta, Nigeria

<sup>3</sup>College of Human Sciences, Human Development and Family Studies, Auburn University, Auburn, Alabama, USA

<sup>4</sup>School of Kinesiology, College of Human Sciences and Education, Louisiana State University, Baton Rouge, Louisiana, USA

<sup>5</sup>Department of Psychiatry, Boston Medical Center, Boston, Massachusetts, USA

26 \*Corresponding author

27 E-mail: [aod0006@auburn.edu](mailto:aod0006@auburn.edu) (AOD)

28

29

30 ¶These authors contributed equally to this work.

31 &These authors also contributed equally to this work.

32

33

34

35

36

37

38

39

40

## 41 **Abstract**

42 **Background:** Depressive disorders, with a prevalence of 15 – 21%, are among the most common  
43 disorders in children and adolescents, and increases the risk of suicide, the second leading cause  
44 of death in children aged 10 to 19.

45 **Aim:** To determine the prevalence and correlates of depressive disorders among senior students  
46 attending secondary schools in Abeokuta.

47 **Method:** The study was conducted in five schools randomly selected from a representative sample  
48 and was carried out in 2 phases. In the first phase, students were selected via systematic random  
49 sampling and given consent forms and GHQ-12 to administer to the parents. In the second phase,  
50 students who returned a signed informed consent form and filled out GHQ-12 were interviewed  
51 using MINI-KID, Rosenberg's Self-Esteem Scale, Family-APGAR, and sociodemographic  
52 questionnaire. Multivariate regression analyses were conducted with p-value <0.05 as level of  
53 significance.

54 **Results:** The mean age was 15.3 years (SD=1.27); 48.8% were male. The twelve-month  
55 prevalence of major depression was 11.3% and dysthymia was 1.4%. In the final regression  
56 analysis, female gender [OR=4.3, p=0.046], the experience of bullying [OR=7.96, p=0.004],  
57 difficulty getting along with friends, [OR=7.5, p=0.004], history of sexual abuse [OR=8.1,  
58 p=0.01], and perceived family dysfunction [OR=4.9, p=0,023] were found to be independent  
59 predictors of depressive disorders

60 **Conclusion:** Depressive syndromes are a significant health burden in adolescents. Being female,  
61 being bullied, having a history of sexual abuse, and family dysfunctionality are risk factors  
62 associated with depression among these population.

## 63 Introduction

64 Depressive disorders are among the most common disorders in children and adolescents,  
65 with high prevalence of 12% (1) and rising to 21% (1-4). Depression increases the risk of suicide,  
66 the second leading cause of death in children and young adults between ages ten and twenty four  
67 (5) and one of the top ten leading causes of death across all ages (5, 6). The reported prevalence  
68 of depression among the adolescent population varies widely due to differences in the  
69 methodology of various epidemiological studies. Current literature suggests that major depressive  
70 disorder is more prevalent than dysthymia and other subtypes of depression (7, 8). Before puberty,  
71 there is no significant difference in the prevalence of depression between the genders, but after  
72 that, an increased incidence in females is widely documented across various cultures (9, 10).  
73 Overall, the prevalence of depression rises with increasing adolescent age (11-13).

74 Etiological models suggest that exposure to multiple antecedents interacts with innate  
75 characteristics to increase adolescents' risk of depression. Individual risks for depression in  
76 adolescents include certain genetic factors, female gender, endocrine dysfunction, negative  
77 cognitive styles, sub-clinical depressive symptoms, specific personality traits, and problems in  
78 self-regulation/coping behaviors, while risks from the external environment include faulty parent-  
79 child relationships, adverse life events and on-going interpersonal difficulties (14-17).

80 The genetic contribution to the etiology of adolescent depression appears to be moderate, with  
81 heritability estimates ranging between 40 -70% (14, 18). There is a three to four-fold increased  
82 risk of depression in the offspring of adults with unipolar depression compared to children of non-  
83 depressed parents (19), which is significantly higher in cases of post-natal maternal depression

84 (20). This elevated risk is also seen in other forms of parental psychopathology, although the  
85 association's strength is greatest for parental depression.

86 Studies have shown that low self-esteem, characterized by global self-devaluation,  
87 perceived incompetence, and negative attributional styles, are cognitive factors that markedly  
88 increase the risk of depression in adolescents (21, 22). Furthermore, adolescents with a highly  
89 emotional temperamental style (neuroticism) characterized by reacting quickly to everyday events,  
90 being easily brought to tears, or easily soothed are also recognized to have a significantly elevated  
91 risk of depression (23).

92 Relational conflicts within the family environment play a major role in the etiology of  
93 adolescent depression. Studies show that insecure attachment and parenting characterized by  
94 coldness, rejection, harsh discipline, and unsupportive behavior are associated with adolescent  
95 depressive symptoms (17). Parental psychopathology, particularly maternal depression, may  
96 contribute to chronic interpersonal stress in the family, compromising the quality of parenting,  
97 which may negatively affect youths' psychosocial functioning, (24) Other family-based pathogenic  
98 factors include physical abuse, neglect, absent monitoring, marital discord, low family cohesion,  
99 lack of authoritative parenting, severe acute disruptions such as sudden death or serious illness in  
100 a close relative and sudden parental separation (25-27).

101 Depression is markedly increased due to multiple adverse experiences involving  
102 longstanding family and more recent friendship events and peer difficulties. Adolescents with poor  
103 friendships, characterized by low numbers of friends, infrequent contact, and no intimate relations,  
104 are more likely to develop depression, deviant behaviors, and increased social isolation from the

105 desired peer network (22, 28, 29). Studies have also shown that adolescents who are bullied and  
106 those who are bullies are at an increased risk of depression and suicide (30, 31).

107 Local studies on the prevalence and correlates of depression show findings largely  
108 comparable with results from elsewhere. A cross-sectional survey of adolescents in southwest  
109 Nigeria found that 5.1% met the criteria for a major depressive disorder (MDD) (4). A study using  
110 the Beck's Depressive Inventory found 9% of school-attending adolescents in another  
111 southwestern town in Nigeria to have clinically significant depressive symptoms (21) with a  
112 diagnosis of MDD established in 6.9% of the total sample (32). In another cohort of high school  
113 students in a major city in north-eastern Nigeria, a 12% prevalence of depression was reported  
114 with 50% of the students who used substances reporting depression (2).

115 Parental depressive symptoms, perception of poor family functioning, peer problems, low  
116 self-esteem, female gender, and large family size are some of the factors that have been associated  
117 with clinically significant depressive symptoms in adolescents (21). Other factors that are  
118 significantly associated with depression in adolescents include alcohol consumption, drug abuse  
119 (33), sexual activity (33, 34), and physical violence (33-35). Lower levels of physical activity has  
120 also been linked with severe depressive symptoms (33, 36), while moderate physical activity was  
121 linked with reduced risk of depressive symptoms (33).

122 Several studies worldwide have sought to establish the prevalence and associated  
123 socioeconomic burden of depressive syndromes in adolescents. However, only a few studies have  
124 been done in subsaharan Africa to address the subject (2, 7, 32, 37-39). This study aims to  
125 determine the prevalence and correlates of depressive disorders among senior students attending  
126 secondary schools in Abeokuta.

## 127 **Methods**

128           The study was carried out in Abeokuta, southwestern Nigeria. It is part of a larger study  
129 conducted among secondary school students aged 12 – 18, from January 25<sup>th</sup> 2016 to March 18<sup>th</sup>  
130 2016, and the methodology has been described elsewhere (40). The study was conducted in 2  
131 phases. In the first phase, students were selected via systematic random sampling and given  
132 consent forms and GHQ-12 to administer to the parents. In the second phase, students who returned  
133 a signed informed consent form and filled out GHQ-12 were interviewed using MINI-KID,  
134 Rosenberg's Self-Esteem Scale, Family-APGAR, and sociodemographic questionnaire. Five  
135 schools were randomly selected, and from each school, a proportional sampling method,  
136 accounting for the sizes of each school, was employed. The sample size was calculated using the  
137 formula for estimating proportions (41).

### 138 **Study Instruments**

#### 139 *Sociodemographic Questionnaire*

140           This was designed to collect data on the sociodemographic characteristics of the  
141 participants and factors linked to depression, such as trauma exposure, history of medical illness,  
142 etc. It also collected information about family structure and health-related behaviors.

#### 143 *Rosenberg's Self-Esteem Scale*

144           The 10-item Rosenberg's Self-Esteem Scale (42) measures both positive and negative  
145 thoughts about oneself to evaluate participants' overall sense of self-worth. The responses to each  
146 question are given on a 4-point Likert scale, with the options being 'strongly agree' to 'strongly  
147 disagree.' Higher ratings on the scale correspond to higher levels of self-esteem. It has been tested

148 on samples of teenage girls from Nigeria (21). In this study, it was utilized to gauge the degree of  
149 adolescent self-esteem.

### 150 ***MINI-KID***

151 The Mini International Neuropsychiatric Interview version for children (MINI-KID) is a  
152 diagnostic interview specifically developed for children and adolescents aged 6-17 years (43). It  
153 was created to give clinicians a quick, valid, and accurate way to diagnose current DSM-IV and  
154 ICD-10 psychiatric illnesses and suicidality in child and adolescent populations. It generally has  
155 satisfactory psychometric properties, with excellent reliability estimates: kappa values of 1.00 and  
156 0.72 for inter-rater and test-retest reliability (44). The MINI-KID was utilized to identify  
157 depressive disorders in the study sample. The MINI-KID's current timeframe for the specific  
158 depressive disorders was adjusted for this investigation to the previous 12 months. It has been used  
159 in studies in Nigeria with good psychometric properties (45, 46).

### 160 ***Family APGAR***

161 The Family APGAR (47) is a brief screening questionnaire created to get a respondent's  
162 opinion of how well their family is doing. It consists of five questions that measure how satisfied  
163 respondents are with each of the five aspects of family functioning: adaptability, partnership,  
164 growth, affection, and resolve. Each parameter is rated on a 3-point scale: 0 for rarely, 1 for  
165 occasionally, and 2 for almost always. A family with a total score of 0 to 3 is likely to be very  
166 dysfunctional, 4-6 is likely to be moderately dysfunctional, and 7 to 10 is likely to be highly  
167 functioning. In various local investigations, the Family APGAR Score is valid and accurate for  
168 evaluating family functioning (48, 49). The participating students finished it without any  
169 assistance.



## 170 **Data Analysis**

171 Statistical Package for Social Sciences (SPSS) for Windows—Version 25.0—was used to  
172 analyze the study's data. The independent t-test and analysis of variance (ANOVA) for continuous  
173 variables and chi-square statistics for categorical variables were used to evaluate the relationships  
174 between diagnostic categories and various sociodemographic, family, and psychosocial variables.  
175 Post-hoc analysis was conducted on statistically significant variables in the ANOVA analyses, and  
176 Fisher's exact test was utilized as needed. Pearson's correlation was used to analyze the association  
177 between continuous psychosocial factors, including self-esteem, perceived family functioning  
178 (FAPGAR Score), and academic success (Exam score). Statistically significant variables in the  
179 bivariate analyses were entered into a multiple regression analysis model to identify independent  
180 predictors of depression. The Kolmogorov-Smirnov test was used to determine whether  
181 continuous variables such as age, FAPGAR score, overall academic exam score, and self-esteem  
182 score were normal.

## 183 **Ethical approval**

184 Ethical approval was obtained from the Ethical Committee of the Neuropsychiatric  
185 Hospital and the Ogun State Ministry of Education, Science, and Technology, and the  
186 administrators of the selected schools granted permission. The parents/guardians of all the  
187 participating students also provided written and signed informed consent forms. Additionally, it  
188 was made clear to the students that participation was voluntary, and they could decide to withdraw  
189 from the study at any time, and not participation would not affect their academic performance.  
190 Teachers were not allowed in the room during the interviews to provide extra protection.

191

## 192 Results

193 A total of 225 students were selected to participate in the study, 5 (1.96%) of them declined  
194 to participate (they were all SSS 3 students who had a significant test the next day), and 6 (2.35%)  
195 were excluded because they were older 18 years. The final sample size was 214.

### 196 *Sociodemographic characteristics*

197 Table 1 summarizes the sociodemographic characteristics. The mean age was 15.3 years  
198 (SD=1.27); 48.8% were male. Only 0.9% of fathers and 1.4% of mothers reported no formal  
199 education; and 3.8% of fathers were unemployed compared to 6.1% of mothers.

200

201 **Table 1: Sociodemographic Characteristics of Participants.**

| Characteristic   | Frequency (n) | Percentage (%) |
|------------------|---------------|----------------|
| <b>Age Group</b> |               |                |
| 12-15            | 119           | 55.9           |
| 16-18            | 94            | 44.1           |
| <b>Gender</b>    |               |                |
| Female           | 109           | 51.2           |
| Male             | 104           | 48.8           |
| <b>Class</b>     |               |                |
| SS1              | 54            | 25.4           |
| SS2              | 89            | 41.8           |
| SS3              | 70            | 32.9           |
| <b>Religion</b>  |               |                |
| Islam            | 69            | 32.4           |
| Christian        | 144           | 67.6           |
| <b>Tribe</b>     |               |                |
| Yoruba           | 189           | 88.7           |
| Igbo             | 12            | 5.6            |
| Hausa/Fulani     | 3             | 1.4            |

|                                           |     |      |
|-------------------------------------------|-----|------|
| Others                                    | 9   | 4.2  |
| <b><i>Parental level of education</i></b> |     |      |
| <b>Father</b>                             |     |      |
| No formal education                       | 2   | 0.9  |
| Primary Education                         | 44  | 20.7 |
| Secondary education                       | 54  | 25.4 |
| Tertiary education                        | 95  | 44.6 |
| Unknown                                   | 18  | 8.5  |
| <b>Mother</b>                             |     |      |
| No education                              | 3   | 1.4  |
| Primary education                         | 61  | 28.6 |
| Secondary education                       | 67  | 31.5 |
| Tertiary education                        | 71  | 33.3 |
| Unknown                                   | 11  | 5.2  |
| <b><i>Parental employment</i></b>         |     |      |
| <b>Father</b>                             |     |      |
| Not Applicable/unknown                    | 9   | 4.2  |
| Unemployed                                | 8   | 3.8  |
| Employed                                  | 196 | 92.0 |
| <b>Mother</b>                             |     |      |
| Unemployed                                | 13  | 6.1  |
| Employed                                  | 199 | 93.4 |
| Not reported                              | 1   | 0.5  |

202

203 ***Child-Related Psychosocial Factors***

204 Table 2 shows child-related psychosocial factors. Sixty (28.2%) respondents experiencing  
 205 the loss of a close relative during the previous year; of these, 32 (53.3%) reported close relationship  
 206 with the deceased relative. Only 9.9% reported no friends; 13 (6.1%) people admitted to  
 207 participating in bullying of others; 15.5% reported having experienced bullying; 14 (6.6%)  
 208 participants had experienced sexual abuse (7.3% of girls vs 5.8% boys,  $\chi^2 = 0.214$ ;  $p = 0.644$ ); 8  
 209 (3.8%) people reported current use of psychoactive substances, with alcohol being the most  
 210 popular drug (3.3%).

211 **Table 2: Child-Related Psychosocial Variables**

| <b>Psychosocial characteristic</b> |                                        | <b>Frequency (n)</b> | <b>Percentage (%)</b> |
|------------------------------------|----------------------------------------|----------------------|-----------------------|
| <b>RECENT LOSS</b>                 | No                                     | 150                  | 70.4                  |
|                                    | Yes                                    | 63                   | 29.6                  |
| <b>CLOSE FRIENDS</b>               | None                                   | 21                   | 9.9                   |
|                                    | One                                    | 35                   | 16.4                  |
|                                    | Two                                    | 55                   | 25.8                  |
|                                    | Three or more                          | 102                  | 47.9                  |
| <b>BEST FRIEND</b>                 | No                                     | 46                   | 21.6                  |
|                                    | Yes                                    | 167                  | 78.4                  |
| <b>FRIEND INTERACTION</b>          | Rarely                                 | 9                    | 4.2                   |
|                                    | Somedays                               | 58                   | 27.2                  |
|                                    | Everyday                               | 146                  | 68.5                  |
| <b>GETTING ALONG WITH FRIENDS</b>  | Often quarrel/they don't understand me | 23                   | 10.8                  |
|                                    | Somewhat well                          | 41                   | 19.2                  |
|                                    | Very well                              | 149                  | 70.0                  |
| <b>BEING BULLIED</b>               | Rarely/never                           | 177                  | 83.1                  |
|                                    | Some days                              | 32                   | 15                    |
|                                    | Most days                              | 4                    | 1.9                   |
| <b>BULLYING OTHERS</b>             | Rarely/never                           | 200                  | 93.9                  |
|                                    | Some days                              | 13                   | 6.1                   |
| <b>SEXUALLY ACTIVE</b>             | No                                     | 204                  | 95.8                  |
|                                    | Yes                                    | 9                    | 4.2                   |
| <b>SEX FREQUENCY</b>               | Rarely/never                           | 204                  | 95.8                  |
|                                    | Some days                              | 8                    | 3.8                   |
| <b>SEXUAL ABUSE</b>                | No                                     | 196                  | 92                    |
|                                    | Yes                                    | 17                   | 8                     |
| <b>Substance use</b>               |                                        |                      |                       |
| <b>ALCOHOL USE</b>                 | Rarely/never                           | 206                  | 96.7                  |
|                                    | Some days                              | 6                    | 2.8                   |
|                                    | Most days                              | 1                    | 0.5                   |

|                                      |              |     |      |
|--------------------------------------|--------------|-----|------|
| <b>CIGARETTE USE</b>                 | Rarely/never | 210 | 98.6 |
|                                      | Some days    | 2   | 0.9  |
|                                      | Most days    | 1   | 0.5  |
| <b>CANNABIS USE</b>                  | Rarely/never | 207 | 97.2 |
|                                      | Some days    | 6   | 2.8  |
| <b>CHRONIC ILLNESS</b>               | No           | 182 | 85.4 |
|                                      | Yes          | 31  | 14.6 |
| <b>INVOLVEMENT IN SPORT ACTIVITY</b> | Rarely/never | 108 | 50.7 |
|                                      | Some days    | 89  | 41.8 |
|                                      | Most days    | 16  | 7.5  |

212

### 213 *Academic Performance*

214 The respondents' converted aggregate English and Mathematics scores ranged between 44  
215 and 72. The median score was 56.0, while the mean score was 57.0 (SD = 6.4). There was no  
216 gender differences in academic performances, mean score for males was 57.42(SD = 6.8)  
217 compared to 56.61 (SD = 5.9) for females ( $t = -0.941$ ;  $p = 0.348$ ).

218

### 219 *Rosenberg Self-Esteem Scale*

220 The mean score for the whole sample was 19.07 (SD= 3.5). Boys reported higher scores  
221 compared to girls [19.55 (SD = 3.6) vs 18.61 (SD= 3.3;  $t=-1.997$ ;  $p = 0.049$ ).

### 222 *Prevalence of Depressive Disorders*

223 Twelve-month prevalence for any depressive disorder was 12.2%, major depressive  
224 disorder was 11.3% and dysthymia was 1.4%. Twelve-month prevalence for suicidality was 8.9%.

225

226 **Correlates of Depressive Disorders**

227 These are shown in Table 3. Female gender ( $\chi^2 = 3.865$ ;  $df = 1$ ;  $p = 0.049$ ); mother's  
 228 educational attainment ( $\chi^2 = 11.538$ ;  $df = 4$ ;  $p = 0.021$ ); perceived family dysfunction ( $\chi^2 = 25.870$ ;  
 229  $df = 2$ ;  $p < 0.0001$ ); domestic violence ( $\chi^2 = 6.175$ ;  $df = 2$ ;  $p = 0.046$ ); history of sexual abuse ( $\chi^2$   
 230  $= 14.468$ ;  $df = 1$ ;  $p < 0.0001$ ), being bullied ( $\chi^2 = 13.740$ ;  $df = 2$ ;  $p = 0.001$ ); experiencing a recent  
 231 loss ( $\chi^2 = 5.930$ ;  $df = 1$ ;  $p = 0.015$ ); having fewer number of close friends ( $\chi^2 = 9.814$ ;  $df = 3$ ;  $p =$   
 232  $0.020$ ); and difficulty getting along with friends ( $\chi^2 = 22.999$ ;  $df = 2$ ;  $p < 0.0001$ ) were all  
 233 associated with depressive disorders. There was no association between age, parental  
 234 psychopathology, sibship, single-parent household, polygamous family setting, use of  
 235 psychoactive substances and chronic medical conditions, and depression.

236

237 **Table 3: Correlates of Depressive Disorders**

|                                |                                 | DEPRESSIVE DISORDER |              |          |    |                     |
|--------------------------------|---------------------------------|---------------------|--------------|----------|----|---------------------|
|                                |                                 | No<br>n (%)         | Yes<br>n (%) | $\chi^2$ | df | <i>p</i> -<br>value |
| GENDER                         | FEMALE                          | 91 (83.5)           | 18 (16.5)    | 3.865    | 1  | <b>0.049</b>        |
|                                | MALE                            | 96 (92.3%)          | 8 (7.7)      |          |    |                     |
| AGE GROUP                      | 12 - 15                         | 100 (84.0)          | 19 (16.0)    | 3.557    | 1  | 0.059               |
|                                | 16 - 18                         | 87 (92.6)           | 7 (7.4%)     |          |    |                     |
| RELIGIOUS<br>PARTICIPATION     | Rarely/never                    | 0 (0.0)             | 0 (0.0)      | 0.380    | 1  | 0.771               |
|                                | Sometimes                       | 21 (84.0)           | 4 (16.0)     |          |    |                     |
|                                | Regularly                       | 166 (88.3)          | 22 (11.7)    |          |    |                     |
| FATHER<br>EMPLOYMENT<br>STATUS | Don't<br>know/Not<br>Applicable | 9 (100.0)           | 0 (0.0)      | 2.473    | 2  | 0.290               |
|                                | unemployed                      | 6 (75.0)            | 2 (25.0)     |          |    |                     |
|                                | employed                        | 172 (87.8)          | 24 (12.2)    |          |    |                     |
| MOTHER<br>EMPLOYMENT           | No                              | 9 (69.2)            | 4 (30.8)     | 4.565    | 1  | 0.102               |
|                                | Yes                             | 177 (88.9)          | 22 (11.1)    |          |    |                     |

## STATUS

|                          |                             |            |           |        |   |              |
|--------------------------|-----------------------------|------------|-----------|--------|---|--------------|
| FATHER'S EDUCATION       | No formal education         | 2 (100.0)  | 0 (0.0)   | 5.942  | 4 | 0.312        |
|                          | Primary                     | 41 (93.2)  | 3 (6.8)   |        |   |              |
|                          | Secondary                   | 50 (92.6)  | 4 (7.4)   |        |   |              |
|                          | Tertiary                    | 80 (84.2)  | 15 (15.8) |        |   |              |
| MOTHER'S EDUCATION       | No formal education         | 2 (66.7)   | 1 (33.3)  | 11.538 | 4 | <b>0.021</b> |
|                          | Primary                     | 56 (91.8)  | 5 (8.2)   |        |   |              |
|                          | Secondary                   | 64 (95.5)  | 3 (4.5)   |        |   |              |
|                          | Tertiary                    | 56 (78.9)  | 15 (21.1) |        |   |              |
| FATHER ALIVE             | No                          | 16 (80.0)  | 4 (20.0)  | 1.251  | 1 | 0.447        |
|                          | Yes                         | 171 (88.6) | 22 (11.4) |        |   |              |
| MOTHER ALIVE             | No                          | 7 (100.0)  | 0 (0.0)   | 1.006  | 1 | 0.677        |
|                          | Yes                         | 180 (87.4) | 26 (12.6) |        |   |              |
| PARENTAL SEPARATION      | No                          | 167 (88.4) | 22 (11.6) | 0.502  | 1 | 0.706        |
|                          | Yes                         | 20 (83.3)  | 4 (16.7)  |        |   |              |
| CAREGIVER                | One parent                  | 39 (83.0)  | 8 (17.0)  | 6.878  | 2 | 0.067        |
|                          | Both parents                | 143 (90.5) | 15 (9.5)  |        |   |              |
|                          | Other relative or guardian  | 5 (62.5)   | 3 (37.5)  |        |   |              |
| FAMILY TYPE              | Monogamous                  | 144 (90.0) | 16 (10.0) | 2.921  | 1 | 0.087        |
|                          | Polygamous                  | 43 (81.1)  | 10 (18.9) |        |   |              |
| SIBSHIP                  | None                        | 5 (83.3)   | 1 (16.7)  | 2.272  | 2 | 0.321        |
|                          | 1-4                         | 147 (89.6) | 17 (10.4) |        |   |              |
|                          | 5 or more                   | 35 (81.4)  | 8 (18.6)  |        |   |              |
| DOMESTIC VIOLENCE        | Rarely/never                | 171 (89.5) | 20 (10.5) | 6.175  | 2 | <b>0.046</b> |
|                          | Some days                   | 13 (76.5)  | 4 (23.5)  |        |   |              |
|                          | Most days                   | 3 (60.0)   | 2 (40.0)  |        |   |              |
| PARENTAL PSYCHOPATHOLOGY | Negative                    | 160 (89.4) | 19 (10.6) | 2.652  | 1 | 0.179        |
|                          | Positive                    | 27 (79.4)  | 7 (20.6)  |        |   |              |
| FAMILY FUNCTIONING       | Highly Dysfunctional Family | 3 (50.0)   | 3 (50.0)  | 20.434 | 2 | <b>0.000</b> |

|                            |                                        |            |           |        |   |              |
|----------------------------|----------------------------------------|------------|-----------|--------|---|--------------|
|                            | Moderately Dysfunctional Family        | 15 (62.5)  | 9 (37.5)  |        |   |              |
|                            | Highly Functional Family               | 169 (92.3) | 14 (7.7)  |        |   |              |
| RECENT LOSS                | No                                     | 137 (91.3) | 13 (8.7)  | 5.930  | 1 | <b>0.015</b> |
|                            | Yes                                    | 50 (79.4)  | 13 (20.6) |        |   |              |
| CLOSE FRIENDS              | None                                   | 14 (66.7)  | 7 (33.3)  | 9.814  | 3 | <b>0.020</b> |
|                            | One                                    | 31 (88.6)  | 4 (11.4)  |        |   |              |
|                            | Two                                    | 50 (90.9)  | 5 (9.1)   |        |   |              |
|                            | Three or more                          | 92 (90.2)  | 10 (9.8)  |        |   |              |
| BEST FRIEND                | No                                     | 37 (80.4)  | 9 (19.6)  | 2.965  | 1 | 0.085        |
|                            | Yes                                    | 150 (89.8) | 17 (10.2) |        |   |              |
| FRIEND INTERACTION         | Rarely                                 | 6 (66.7)   | 3 (33.3)  | 3.979  | 2 | 0.137        |
|                            | Somedays                               | 52 (89.7)  | 6 (10.3)  |        |   |              |
|                            | Everyday                               | 129 (88.4) | 17 (11.6) |        |   |              |
| GETTING ALONG WITH FRIENDS | Often quarrel/they don't understand me | 18 (78.3)  | 5 (21.7)  | 22.999 | 2 | <b>0.000</b> |
|                            | Somewhat well                          | 28 (68.3)  | 13 (31.7) |        |   |              |
|                            | Very well                              | 141 (94.6) | 8 (5.4)   |        |   |              |
| SEXUALLY ACTIVE            | No                                     | 181 (88.7) | 23 (11.3) | 3.914  | 1 | 0.145        |
|                            | Yes                                    | 6 (6.7)    | 3 (33.3)  |        |   |              |
| SEX FREQUENCY              | Rarely/never                           | 181 (88.7) | 23 (11.3) | 5.080  | 2 | 0.079        |
|                            | Some days                              | 5 (62.5)   | 3 (37.5)  |        |   |              |
|                            | Most days                              | 1 (100.0)  | 0 (0.0)   |        |   |              |
| SEXUAL ABUSE               | No                                     | 177 (90.3) | 19 (9.7)  | 14.468 | 1 | <b>0.000</b> |
|                            | Yes                                    | 10 (58.8)  | 7 (41.2)  |        |   |              |
| LIFETIME USE               | No                                     | 181 (88.7) | 23 (11.3) | 4.921  | 1 | 0.095        |
|                            | Yes                                    | 5 (62.5)   | 3 (37.5)  |        |   |              |
| CHRONIC ILLNESS            | No                                     | 162 (89.0) | 20 (11.0) | 1.730  | 1 | 0.308        |
|                            | Yes                                    | 25 (80.6)  | 6 (19.4)  |        |   |              |



|                                |              |            |           |       |   |              |
|--------------------------------|--------------|------------|-----------|-------|---|--------------|
| INVOLVEMENT IN SPORTS ACTIVITY | Rarely/never | 90 (83.3)  | 18 (16.7) | 4.486 | 2 | 0.106        |
|                                | Some days    | 83 (93.3)  | 6 (6.7)   |       |   |              |
|                                | Most days    | 14 (87.5)  | 2 (12.5)  |       |   |              |
| BEING BULLIED                  | Rarely/never | 162 (91.5) | 15 (8.5)  | 13.74 | 2 | <b>0.001</b> |
|                                | Some days    | 22 (68.8)  | 10 (31.3) |       |   |              |
|                                | Most days    | 3 (75.0)   | 1 (25.0)  |       |   |              |
| BULLYING OTHERS                | Rarely/never | 175 (87.5) | 25 (12.5) | 0.263 | 1 | 0.939        |
|                                | Some days    | 12 (92.3)  | 1 (7.7)   |       |   |              |
|                                | Most days    | 0 (0.0)    | 0 (0.0)   |       |   |              |

238

239 ***Relationship between Academic Performance and Disorder Type***

240 The aggregate English and mathematics exam scores were standardized to a normative  
 241 mean of 50 and a standard deviation of 10. The standardization was done by obtaining a z score,  
 242 which was multiplied by 10 and added to 50. The standardized scores were then compared between  
 243 respondents diagnosed with depressive disorders vs. unaffected peers. Respondents with  
 244 depressive disorder had a mean score of 44.71 (SD = 7.40), which was lower than the mean score  
 245 of 50.74 (SD = 10.11) for non-depressed peers ( $t = 2.929$ ;  $df = 211$ ;  $p = 0.004$ ).

246 ***Relationship between Self-Esteem and Disorder Type***

247 Participants without depressive disorder had a mean score of 19.67 (SD = 3.181)  
 248 compared to those with depressive disorder with a mean score of 16.42 (SD = 16.42), ( $F = 9.134$ ,  
 249  $df = 3; 209$ ,  $p < 0.0001$ ).

250

251 **Independent Predictors of Depressive Disorders**

252 In the multivariate regression analyses (see Table 4), female gender (OR = 4.250;  $p =$   
 253 0.046), moderate difficulty getting along with friends (OR = 7.502;  $p = 0.004$ ), the experience of  
 254 being occasionally bullied (OR = 7.960;  $p = 0.004$ ), history of sexual abuse (OR = 8.055;  $p =$   
 255 0.010) and moderate family dysfunction (OR = 4.934;  $p = 0.023$ ) were associated with  
 256 depression.

257 **Table 4: Multivariate Logistic Regression of Independent Correlates of Depressive**  
 258 **Disorders**

|                                   | <b>B</b>  | <b>OR</b> | <b><i>p</i></b><br><b>value</b> | <b>95% C.I. for OR</b> |              |
|-----------------------------------|-----------|-----------|---------------------------------|------------------------|--------------|
|                                   |           |           |                                 | <b>Lower</b>           | <b>Upper</b> |
| <b>GENDER</b>                     |           |           |                                 |                        |              |
| Female                            | 1.447     | 4.250     | <b>0.046</b>                    | 1.026                  | 17.600       |
| Male                              | Reference | 1.00      |                                 |                        |              |
| <b>RECENT LOSS</b>                |           |           |                                 |                        |              |
| Yes                               | 0.519     | 1.680     | 0.402                           | 0.499                  | 5.662        |
| No                                | Reference | 1.00      |                                 |                        |              |
| <b>NUMBER OF CLOSE FRIENDS</b>    |           |           |                                 |                        |              |
| None                              | 0.259     | 1.295     | 0.763                           | 0.241                  | 6.956        |
| One                               | -0.652    | 0.521     | 0.509                           | 0.075                  | 3.607        |
| Two                               | -0.385    | 0.681     | 0.630                           | 0.143                  | 3.249        |
| Three or more                     | Reference | 1.00      |                                 |                        |              |
| <b>GETTING ALONG WITH FRIENDS</b> |           |           |                                 |                        |              |
| Quarrelling/misunderstanding      | 0.114     | 1.121     | 0.901                           | 0.186                  | 6.749        |
| Somewhat well                     | 2.183     | 8.874     | <b>0.004</b>                    | 2.045                  | 38.514       |
| Very well                         | Reference | 1.00      |                                 |                        |              |
| <b>SEXUAL ABUSE</b>               |           |           |                                 |                        |              |
| Yes                               | 2.086     | 8.055     | <b>0.010</b>                    | 1.965                  | 32.251       |
| No                                | Reference | 1.00      |                                 |                        |              |
| <b>BEING BULLIED</b>              |           |           |                                 |                        |              |
| Some days                         | 2.074     | 7.960     | <b>0.004</b>                    | 1.965                  | 32.251       |
| Most days                         | 2.317     | 10.149    | 0.121                           | 0.541                  | 190.265      |
| Rarely/Never                      | Reference | 1.00      |                                 |                        |              |
| <b>DOMESTIC VIOLENCE</b>          |           |           |                                 |                        |              |

|                                 |           |        |              |       |         |
|---------------------------------|-----------|--------|--------------|-------|---------|
| Occasionally                    | 0.719     | 2.053  | 0.484        | 0.274 | 15.371  |
| Most Days                       | -0.825    | 0.438  | 0.438        | 0.025 | 7.809   |
| Rarely/Never                    | Reference | 1.00   |              |       |         |
| <b>FAMILY FUNCTIONING</b>       |           |        |              |       |         |
| Highly Dysfunctional Family     | 1.377     | 3.965  | 0.301        | 0.291 | 54.065  |
| Moderately Dysfunctional Family | 1.596     | 4.934  | <b>0.023</b> | 1.241 | 19.613  |
| Highly Functional Family        | Reference | 1.00   |              |       |         |
| <b>LEVEL OF SELF-ESTEEM</b>     |           |        |              |       |         |
| RSES SCORE 1 – 10               | 2.721     | 15.199 | 0.110        | 0.541 | 427.236 |
| RSES SCORE 11 – 20              | 1.380     | 3.973  | 0.101        | 0.764 | 20.656  |
| RSES SCORE 21 – 30              | Reference | 1.00   |              |       |         |

259 RSES: Rosenberg Self-Esteem Scale  
260

## 261 Discussion

262 This study aimed to determine the prevalence and correlates of depressive disorders among  
263 senior students attending secondary schools in Abeokuta. The twelve-month prevalence of any  
264 depressive disorder was 12.2%, and major depressive episode was 11.3%.

265 Our study shows that depressive syndromes are a significant health burden in adolescents.  
266 The reported prevalence in this study is that reported in other studies (1, 2, 22). The apparent  
267 convergence of rates is remarkable, given that these studies used different diagnostic instruments.  
268 Nevertheless, these findings are higher than elsewhere in Africa (7, 32) and the West (50, 51).  
269 Differing prevalence periods could explain the varied findings. In addition, the present study used  
270 a twelve-month window and found a rate closer to the lifetime rate reported in the US comorbidity  
271 survey (1); lower rates tended to be reported by studies using narrower time frames for prevalence  
272 rates.

273           The prevalence of dysthymia reported in this study was 1.4%, and to the best of the authors'  
274 knowledge is the first estimate of the disorder among adolescents in Nigeria. The other available  
275 estimate on dysthymia comes from the Nigerian National Survey of Mental Health and Wellbeing  
276 (NSMHW) by Gureje et al., which found a twelve-month prevalence of 0.1% in the adult  
277 population (52). Similar prevalence rate of dysthymia has been reported in Norway (8) and Uganda  
278 (7). These findings may suggest that although depressive syndromes occur frequently among  
279 adolescents, only a small proportion of episodes tend to run prolonged episodes.

280           In the bivariate analysis, gender and mother's education were the two sociodemographic  
281 variables significantly associated with depressive disorders in this study. This significant excess  
282 of females among adolescents having a depressive disorder has been replicated in many studies,  
283 both local and foreign (36, 53). Gender difference in adolescence generally emerges in middle  
284 adolescence, typically by age 13 (53). This has often led to suggestions that the female excess may  
285 be linked to pubertal changes in girls, specifically the achievement of Tanner stage III or IV (53).  
286 However, the changes in body morphology associated with puberty and their resultant  
287 psychosocial effects on social interactions and self-perception are insufficient to explain the female  
288 adolescent depression excess and underlying changes in androgen and estrogen levels may play a  
289 significant mediating role (54).

290           In this study, depressive disorders appeared to be more prevalent in adolescents with  
291 parents with lower educational attainment, although this difference was only significant for  
292 mothers' educational attainment. Findings from elsewhere mostly report the reverse to be the case,  
293 i.e., adolescents with depression tend to have less educated parents (1, 7, 22). While it may be true  
294 that for some unknown reasons, depressive disorders occur more frequently in adolescents with  
295 better-educated parents in this population, the method of collating the information should be put

296 in perspective. Adolescents' self-report on parental educational attainment might not be a reliable  
297 way of determining the parents' highest level of education, so the finding should be interpreted  
298 with caution. Parental employment status, as reported by the adolescents, was the other  
299 approximate indicator of socioeconomic status included in this study, the analysis of which showed  
300 that depression was more prevalent in respondents with unemployed parents. However, this  
301 difference was not found to be significant. Yet it appears more in keeping with the frequent  
302 associations observed between adolescent depression and low socioeconomic status in other  
303 studies (55).

304 The presence of a depressive disorder was significantly associated with the reported  
305 occurrence of domestic violence and perceived family dysfunction in this study, similar to findings  
306 elsewhere (7, 22, 32, 34). Persistent family disagreement through early adolescence increases the  
307 general level of low mood and depressive symptoms over time, and it is this rising level of non-  
308 clinical negative mood and thoughts that is associated with the onset of later clinical depression in  
309 older adolescents (35, 56). Conversely, it may also be true that depressive symptoms in adolescents  
310 precipitate conflicts in an otherwise normally functioning family (24, 57).

311 Reported traumatic experiences such as a recent loss within the last year, a history of sexual  
312 abuse, and being bullied were seen to be significantly associated with having a depressive disorder  
313 in this study, which is similar to other studies (34, 58). Classic Freudian theory which explains  
314 depression as aggression displaced from an external hostile object and turned inwards against the  
315 self, provides a psychodynamic framework for understanding this association. However, there is  
316 more evidence in the research base to support the cognitive formulation, which proposes that early  
317 adverse experiences could result in an enduring triad of negative cognitions about the self, the  
318 world, and the future, which then become embedded as a latent negative schema and is activated

319 by subsequent events (59, 60). The significant association between depression and the reported  
320 experience of being bullied may be explained by Seligman's learned helplessness theory, which  
321 proposes that frequent exposure to uncontrollable and unpredictable events leads to an enduring  
322 loss of adaptive behaviors, eventually resulting in permanent deficits in cognitive and emotional  
323 processes (61).

324 Significant associations were also identified with impairments in peer relations in this  
325 study. Adolescents diagnosed with depressive disorder tended to report having fewer or no close  
326 friends at all and appeared to be experiencing difficulties getting along with friends. This agrees  
327 with findings by Fields et al., who showed that depressed adolescents had less optimal peer  
328 relationships, fewer friends, and were less popular than unaffected peers (62). Although  
329 interpersonal difficulties appear more to be a consequence rather than an antecedent of depression  
330 in adolescents, there is evidence that heightened sociotropy (an increased need or desire for peer  
331 approval) in the adolescent may render them more vulnerable to depression in the context of  
332 ongoing relational dysfunction with friends (62).

333 Regarding self-esteem, those with depressive disorders reported lower self-esteem  
334 compared to those who did not have depression, similar to other studies (21, 22, 63). Two possible  
335 models explain the observed strong link between depression and reduced self-esteem. The  
336 vulnerability model hypothesizes that low self-esteem is a risk factor for depression, whereas the  
337 scar model hypothesizes that low self-esteem is an outcome, not a cause, of depression. The  
338 direction of causality appears to have been resolved in favor of the vulnerability model by  
339 longitudinal studies utilizing cross-lagged regression analyses, which indicated that low self-  
340 esteem predicted subsequent levels of depression and not vice versa (63).

341 Depressive disorders were significantly associated with reduced academic performance in  
342 this study, which is similar to findings by Hysenbegasi and colleagues (64). Depression is  
343 associated with reduced volition, impaired concentration, and a general loss of interest in day-to-  
344 day tasks. Beyond potentially causing school absenteeism, affected adolescents might not fully  
345 engage in academic activities even when they attend school. Furthermore, intrinsic cognitive  
346 deficits are a recognized neuropsychological endophenotype of depression and may further limit  
347 academic performance even in the presence of sufficient engagement with school work (65).

348 In the multivariate regression analysis, female gender, the experience of bullying, difficulty  
349 getting along with friends, history of sexual abuse, lower self-esteem, and perceived family  
350 dysfunction were found to be independent predictors of depressive disorders, which is similar to  
351 what has been reported in other studies from around the world (1, 21, 22). Traumatic childhood  
352 experiences, in particular, are well-recognized as strong predictors for the subsequent onset of  
353 emotional disorders and even other psychiatric disorders (66, 67).

354 The regression model could only explain 50.2% of the variance in depressive illnesses in  
355 this study. This shows that a significant percentage of the variation in depressive disorders among  
356 adolescents may be explained by factors not considered in the current model, such as biological  
357 vulnerability. According to a meta-analysis of the genetic epidemiology of depression, the  
358 heritability was around 37% (68). Such additive genetic factors are thought to moderate the risk of  
359 the onset of major depression in part by altering the sensitivity of individuals to some of the  
360 depression-inducing psychosocial stressors identified in the present study.

361 This study comes with some limitations. Firstly, due to the study's cross-sectional nature,  
362 causal inferences cannot be made. Secondly, the study was limited to a single city in the Southwest  
363 part of the country and may not be generalizable to adolescents in Nigeria. Thirdly, some of the

364 questionnaires were self-reported and may be subject to response bias and social desirability bias,  
365 which may affect study validity. Fourth, the small sample size may limit the study's power to detect  
366 statistically significant associations. Nevertheless, the final sample size was more than the  
367 calculated minimum sample size needed to detect a difference. The study also has strengths: this  
368 study went beyond the scope of previous work done in Nigeria on adolescent depression to  
369 investigate additional possible correlates, such as parental educational attainment. This study was  
370 also the first to report the prevalence of dysthymia among the adolescent population in Nigeria.

371 In conclusion, this study demonstrated that the prevalence of depressive illnesses in our  
372 environment is at par with reports from other parts of Africa and the rest of the world. The study  
373 also emphasized characteristics associated with depression, including being bullied, having a  
374 history of sexual abuse, having low self-esteem, and family dysfunctionality. Studies with larger  
375 adolescent samples that combine structured diagnostic interviews with self-report depression  
376 instruments in a two-stage design may be able to find other significant relationships that were  
377 missed in the current study.

378

## 379 **References**

- 380 1. Merikangas KR, He J-p, Burstein M, Swanson SA, Avenevoli S, Cui L, et al. Lifetime  
381 prevalence of mental disorders in US adolescents: results from the National Comorbidity Survey  
382 Replication–Adolescent Supplement (NCS-A). *Journal of the American Academy of Child &*  
383 *Adolescent Psychiatry*. 2010;49(10):980-9. doi: 10.1016/j.jaac.2010.05.017
- 384 2. Abdulmalik JO, Omigbodun O, Wakil M, Beida O. Comorbidity of Depression with  
385 Substance use among High School Students in Northern Nigeria. *Addiction*. 2012;5.
- 386 3. Osborn TL, Venturo-Conerly KE, Wasil AR, Schleider JL, Weisz JR. Depression and  
387 Anxiety Symptoms, Social Support, and Demographic Factors Among Kenyan High School  
388 Students. *Journal of Child and Family Studies*. 2020;29(5):1432-43. doi: 10.1007/s10826-019-  
389 01646-8

390



- 391 4. Fatiregun A, Kumapayi T. Prevalence and correlates of depressive symptoms among in-  
392 school adolescents in a rural district in southwest Nigeria. *Journal of adolescence*.  
393 2014;37(2):197-203. doi: 10.1016/j.adolescence.2013.12.003
- 394 5. Heron MP. Deaths: leading causes for 2017. *National vital statistics reports*. 2019.
- 395 6. Curtin SC, Warner M, Hedegaard H. Increase in suicide in the United States, 1999-2014:  
396 US Department of Health and Human Services, Centers for Disease Control and ...; 2016.
- 397 7. Kinyanda E, Kizza R, Abbo C, Ndyabangi S, Levin J. Prevalence and risk factors of  
398 depression in childhood and adolescence as seen in 4 districts of north-eastern Uganda. *BMC*  
399 *international health and human rights*. 2013;13:1-10. doi: 10.1186/1472-698X-13-19
- 400 8. Sund AM, Larsson B, Wichstrøm L. Prevalence and characteristics of depressive  
401 disorders in early adolescents in central Norway. *Child and adolescent psychiatry and mental*  
402 *health*. 2011;5(1):1-13. doi: 10.1186/1753-2000-5-28
- 403 9. Kessler RC, Avenevoli S, Merikangas KR. Mood disorders in children and adolescents:  
404 an epidemiologic perspective. *Biological psychiatry*. 2001;49(12):1002-14. doi: 10.1016/S0006-  
405 3223(01)01129-5
- 406 10. Lewinsohn PM, Rohde P, Seeley JR. Major depressive disorder in older adolescents:  
407 prevalence, risk factors, and clinical implications. *Clinical psychology review*. 1998;18(7):765-  
408 94. doi: 10.1016/S0272-7358(98)00010-5
- 409 11. Wilson S, Dumornay NM. Rising Rates of Adolescent Depression in the United States:  
410 Challenges and Opportunities in the 2020s. *J Adolesc Health*. 2022;70(3):354-5. doi:  
411 10.1016/j.jadohealth.2021.12.003
- 412 12. Fleming JE, Offord DR. Epidemiology of childhood depressive disorders: A critical  
413 review. *Journal of the American Academy of Child & Adolescent Psychiatry*. 1990;29(4):571-  
414 80. doi: 10.1097/00004583-199007000-00010
- 415 13. Costello EJ, Mustillo S, Erkanli A, Keeler G, Angold A. Prevalence and development of  
416 psychiatric disorders in childhood and adolescence. *Archives of general psychiatry*.  
417 2003;60(8):837-44. doi: 10.1001/archpsyc.60.8.837
- 418 14. Garber J. Depression in children and adolescents: linking risk research and prevention.  
419 *American journal of preventive medicine*. 2006;31(6):104-25. doi:  
420 10.1016/j.amepre.2006.07.007
- 421 15. MacPhee AR, Andrews JJ. Risk factors for depression in early adolescence. *Adolescence*.  
422 2006;41(163):435-66.
- 423 16. Wells VE, Deykin EY, Klerman GL. Risk factors for depression in adolescence.  
424 *Psychiatric Developments*. 1985;3(1):83-108.
- 425 17. Greszta E. Family environment risk factors of depression in adolescence. *Psychiatria*  
426 *polska*. 2006;40:719-30.
- 427 18. McGuffin P, Katz R, Watkins S, Rutherford J. A hospital-based twin register of the  
428 heritability of DSM-IV unipolar depression. *Archives of general psychiatry*. 1996;53(2):129-36.  
429 doi: 10.1001/archpsyc.1996.01830020047006
- 430 19. Strober M. Family-genetic aspects of juvenile affective disorders 2001. 179-203 p.
- 431 20. Halligan SL, Murray L, Martins C, Cooper PJ. Maternal depression and psychiatric  
432 outcomes in adolescent offspring: a 13-year longitudinal study. *Journal of affective disorders*.  
433 2007;97(1-3):145-54. doi: 10.1016/j.jad.2006.06.010
- 434 21. Adewuya AO, Ologun YA. Factors associated with depressive symptoms in Nigerian  
435 adolescents. *Journal of adolescent health*. 2006;39(1):105-10. doi:  
436 10.1016/j.jadohealth.2005.08.016

- 437 22. Lin HC, Tang TC, Yen JY, Ko CH, Huang CF, Liu SC, et al. Depression and its  
438 association with self-esteem, family, peer and school factors in a population of 9586 adolescents  
439 in southern Taiwan. *Psychiatry and Clinical neurosciences*. 2008;62(4):412-20. doi:  
440 10.1111/j.1440-1819.2008.01820.x
- 441 23. Goodyer I, Herbert J, Tamplin A, Altham P. First-episode major depression in  
442 adolescents: Affective, cognitive and endocrine characteristics of risk status and predictors of  
443 onset. *The British Journal of Psychiatry*. 2000;176(2):142-9. doi: 10.1192/bjp.176.2.142
- 444 24. Hammen C, Shih JH, Brennan PA. Intergenerational transmission of depression: test of  
445 an interpersonal stress model in a community sample. *Journal of consulting and clinical*  
446 *psychology*. 2004;72(3):511. doi: 10.1037/0022-006X.72.3.511
- 447 25. Fendrich M, Warner V, Weissman MM. Family risk factors, parental depression, and  
448 psychopathology in offspring. *Developmental psychology*. 1990;26(1):40. doi: 10.1037/0012-  
449 1649.26.1.40
- 450 26. Jaffee SR, Moffitt TE, Caspi A, Fombonne E, Poulton R, Martin J. Differences in early  
451 childhood risk factors for juvenile-onset and adult-onset depression. *Archives of general*  
452 *psychiatry*. 2002;59(3):215-22. doi:10.1001/archpsyc.59.3.215
- 453 27. Sagrestano LM, Paikoff RL, Holmbeck GN, Fendrich M. A longitudinal examination of  
454 familial risk factors for depression among inner-city African American adolescents. *Journal of*  
455 *family psychology*. 2003;17(1):108. doi: 10.1037/0893-3200.17.1.108
- 456 28. Cairns RB, Leung MC, Buchanan L, Cairns BD. Friendships and social networks in  
457 childhood and adolescence: Fluidity, reliability, and interrelations. *Child development*.  
458 1995;66(5):1330-45. doi: 10.2307/1131650
- 459 29. Reinherz HZ, Giaconia RM, Pakiz B, Silverman AB, Frost AK, Lefkowitz ES.  
460 Psychosocial risks for major depression in late adolescence: A longitudinal community study.  
461 *Journal of the American Academy of Child & Adolescent Psychiatry*. 1993;32(6):1155-63. doi:  
462 10.1097/00004583-199311000-00007
- 463 30. Kaltiala-Heino R, Rimpelä M, Marttunen M, Rimpelä A, Rantanen P. Bullying,  
464 depression, and suicidal ideation in Finnish adolescents: school survey. *Bmj*.  
465 1999;319(7206):348-51. doi: 10.1136/bmj.319.7206.348
- 466 31. Klomek AB, Marrocco F, Kleinman M, Schonfeld IS, Gould MS. Bullying, depression,  
467 and suicidality in adolescents. *Journal of the American Academy of Child & Adolescent*  
468 *Psychiatry*. 2007;46(1):40-9. doi: 10.1097/01.chi.0000242237.84925.18
- 469 32. Adewuya AO, Ola BA, Aloba OO. Prevalence of major depressive disorders and a  
470 validation of the Beck Depression Inventory among Nigerian adolescents. *European Child &*  
471 *Adolescent Psychiatry*. 2007;16:287-92. doi: 10.1007/s00787-006-0557-0
- 472 33. Lee J, Han C, Ko YH, Lee MS, Yoon HK. Assessment of life factors affecting the  
473 experience of depressive symptoms in adolescents: a secondary analysis using the Korea Youth  
474 Risk Behavior Survey. *Child Adolesc Psychiatry Ment Health*. 2021;15(1):50. doi:  
475 10.1186/s13034-021-00407-0
- 476 34. Zinzow HM, Ruggiero KJ, Resnick H, Hanson R, Smith D, Saunders B, et al. Prevalence  
477 and mental health correlates of witnessed parental and community violence in a national sample  
478 of adolescents. *Journal of child Psychology and psychiatry*. 2009;50(4):441-50. doi:  
479 10.1111/j.1469-7610.2008.02004.x
- 480 35. Sternberg KJ, Lamb ME, Guterman E, Abbott CB. Effects of early and later family  
481 violence on children's behavior problems and depression: A longitudinal, multi-informant  
482 perspective. *Child abuse & neglect*. 2006;30(3):283-306. doi: 10.1016/j.chiabu.2005.10.008

- 483 36. Adeniyi AF, Okafor NC, Adeniyi CY. Depression and physical activity in a sample of  
484 nigerian adolescents: levels, relationships and predictors. *Child and adolescent psychiatry and*  
485 *mental health*. 2011;5:1-10. doi: 10.1186/1753-2000-5-16
- 486 37. Abbo C, Kinyanda E, Kizza RB, Levin J, Ndyabangi S, Stein DJ. Prevalence,  
487 comorbidity and predictors of anxiety disorders in children and adolescents in rural north-eastern  
488 Uganda. *Child and adolescent psychiatry and mental health*. 2013;7(1):1-11. doi: 10.1186/1753-  
489 2000-7-21
- 490 38. Muris P, Schmidt H, Engelbrecht P, Perold M. DSM-IV–defined anxiety disorder  
491 symptoms in South African children. *Journal of the American Academy of Child & Adolescent*  
492 *Psychiatry*. 2002;41(11):1360-8. doi: 10.1097/00004583-200211000-00018
- 493 39. Ndeti DM, Khasakhala L, Nyabola L, Ongecha-Owuor F, Seedat S, Mutiso V, et al. The  
494 prevalence of anxiety and depression symptoms and syndromes in Kenyan children and  
495 adolescents. *Journal of Child & Adolescent Mental Health*. 2008;20(1):33-51. doi:  
496 10.2989/JCAMH.2008.20.1.6.491
- 497 40. Nzeakah C W, DadeMatthews AO, Onofa U O, DadeMatthews O D, T. O. Crippled By  
498 Fear: Anxiety Disorders Among Adolescents In Nigeria. . *International Journal of Psychiatry*.  
499 2022;7(2):103-15.
- 500 41. Araoye MO. *Research methodology with statistics for health and social sciences*. Ilorin:  
501 Nathadex Publisher; 2003. 25-120 p.
- 502 42. Rosenberg M. *Society and the adolescent self-image*.(revised edition). Middletown,  
503 Connecticut: Wesleyan University Press; 1989.
- 504 43. Sheehan DV, Lecrubier Y, Sheehan KH, Amorim P, Janavs J, Weiller E, et al. The Mini-  
505 International Neuropsychiatric Interview (MINI): the development and validation of a structured  
506 diagnostic psychiatric interview for DSM-IV and ICD-10. *Journal of clinical psychiatry*.  
507 1998;59(20):22-33.
- 508 44. Sheehan DV, Sheehan KH, Shytle RD, Janavs J, Bannon Y, Rogers JE, et al. Reliability  
509 and validity of the mini international neuropsychiatric interview for children and adolescents  
510 (MINI-KID). *The Journal of clinical psychiatry*. 2010;71(3):17393.
- 511 45. Adegunloye O, Yusuf A, Ajiboye P, Issa B, Buhari O. Prevalence and Correlates of  
512 Druptive Behaviour Disorders in Youths in a Juvenile Borstal Institution. *Niger J Psychiatry*.  
513 2010;8(3):12-7. doi: 10.4314/njpsyc.v8i3.60086
- 514 46. Adeyemo S, Adeosun II, Ogun OC, Adewuya A, David AN, Adegbohun AA, et al.  
515 Depression and suicidality among adolescents living with human immunodeficiency virus in  
516 Lagos, Nigeria. *Child and Adolescent Psychiatry and Mental Health*. 2020;14:1-10. doi:  
517 10.1186/s13034-020-00337-3
- 518 47. Smilkstein G. The family APGAR: a proposal for a family function test and its use by  
519 physicians. *J fam pract*. 1978;6(6):1231-9.
- 520 48. Esegbe E, Esegbe P, Nuhu F, Sheikh T, Majebi M, Kalu A, et al. Impact of childhood  
521 mental health disorders on the family: A Case report. *Nigerian Journal of Paediatrics*.  
522 2013;40(4):419-21. doi: 10.4314/njp.v40i4.14
- 523 49. Muyibi AS, Ajayi I-OO, Irabor AE, Ladipo MM. Relationship between adolescents'  
524 family function with socio-demographic characteristics and behaviour risk factors in a primary  
525 care facility. *African journal of Primary health care and Family Medicine*. 2010;2(1):1-7. doi:  
526 10520/EJC134393

- 527 50. Jane Costello E, Erkanli A, Angold A. Is there an epidemic of child or adolescent  
528 depression? *Journal of child psychology and psychiatry*. 2006;47(12):1263-71. doi:  
529 10.1111/j.1469-7610.2006.01682.x
- 530 51. Maughan B, Collishaw S, Stringaris A. Depression in childhood and adolescence. *Journal*  
531 *of the Canadian Academy of Child and Adolescent Psychiatry*. 2013;22(1):35.
- 532 52. Gureje O, Lasebikan VO, Kola L, Makanjuola VA. Lifetime and 12-month prevalence of  
533 mental disorders in the Nigerian Survey of Mental Health and Well-Being. *The British Journal of*  
534 *Psychiatry*. 2006;188(5):465-71. doi: 10.1192/bjp.188.5.465
- 535 53. Angold A, Costello EJ. The epidemiology of depression in children and adolescents. *The*  
536 *depressed child and adolescent*, 2nd ed. Cambridge child and adolescent psychiatry. New York,  
537 NY, US: Cambridge University Press; 2001. p. 143-78. doi: 10.1017/CBO9780511543821.007
- 538 54. Angold A, Costello E, Erkanli A, Worthman C. Pubertal changes in hormone levels and  
539 depression in girls. *Psychological medicine*. 1999;29(5):1043-53. doi:  
540 10.1017/S0033291799008946
- 541 55. Xu F, Cui W, Xing T, Parkinson M. Family Socioeconomic Status and Adolescent  
542 Depressive Symptoms in a Chinese Low- and Middle- Income Sample: The Indirect Effects of  
543 Maternal Care and Adolescent Sense of Coherence. *Front Psychol*. 2019;10:819. doi:  
544 10.3389/fpsyg.2019.00819
- 545 56. Rueter MA, Scaramella L, Wallace LE, Conger RD. First onset of depressive or anxiety  
546 disorders predicted by the longitudinal course of internalizing symptoms and parent-adolescent  
547 disagreements. *Archives of general psychiatry*. 1999;56(8):726-32. doi:  
548 10.1001/archpsyc.56.8.726
- 549 57. Hammen C, Rudolph K, Weisz J, Rao U, Burge D. The context of depression in clinic-  
550 referred youth: Neglected areas in treatment. *Journal of the American Academy of Child &*  
551 *Adolescent Psychiatry*. 1999;38(1):64-71. doi: 10.1097/00004583-199901000-00021
- 552 58. Nguyen DT, Dedding C, Pham TT, Wright P, Bunders J. Depression, anxiety, and  
553 suicidal ideation among Vietnamese secondary school students and proposed solutions: a cross-  
554 sectional study. *BMC public health*. 2013;13:1-10. doi: 10.1186/1471-2458-13-1195
- 555 59. Beck AT. *Cognitive therapy of depression*: Guilford press; 1979.
- 556 60. Lewinsohn PM, Clarke GN. Psychosocial treatments for adolescent depression. *Clinical*  
557 *psychology review*. 1999;19(3):329-42. doi: 10.1016/S0272-7358(98)00055-5
- 558 61. Seligman ME. *On depression, development, and death*; 1975.
- 559 62. Field T, Diego M, Sanders C. Adolescent depression and risk factors. *Adolescence*.  
560 2001;36(143):491-8.
- 561 63. Sowislo JF, Orth U. Does low self-esteem predict depression and anxiety? A meta-  
562 analysis of longitudinal studies. *Psychol Bull*. 2013;139(1):213-40. doi: 10.1037/a0028931
- 563 64. Hysenbegasi A, Hass SL, Rowland CR. The impact of depression on the academic  
564 productivity of university students. *Journal of mental health policy and economics*.  
565 2005;8(3):145.
- 566 65. Bulbena A, Berrios G. Cognitive function in the affective disorders: a prospective study.  
567 *Psychopathology*. 1993;26(1):6-12. doi: 10.1159/000284794
- 568 66. Bender K, Brown SM, Thompson SJ, Ferguson KM, Langenderfer L. Multiple  
569 victimizations before and after leaving home associated with PTSD, depression, and substance  
570 use disorder among homeless youth. *Child maltreatment*. 2015;20(2):115-24. doi:  
571 10.1177/1077559514562859

572 67. Kessler RC, Davis CG, Kendler KS. Childhood adversity and adult psychiatric disorder  
573 in the US National Comorbidity Survey. *Psychological medicine*. 1997;27(5):1101-19. doi:  
574 10.1017/S0033291797005588

575 68. Sullivan PF, Neale MC, Kendler KS. Genetic epidemiology of major depression: review  
576 and meta-analysis. *American journal of psychiatry*. 2000;157(10):1552-62. doi:  
577 10.1176/appi.ajp.157.10.1552

578
